# Supplementary material for: Deep learning applied to CO 2 power plant emissions quantification using simulated satellite images
Source: Copernicus journal article supplement (doi:10.5194/gmd-17-1995-2024), 2024-03-05
Supplement: Supplementary file 1 [file gmd-17-1995-2024-supplement.pdf]

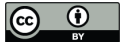

*Supplement of*

## **Deep learning applied to CO<sub>2</sub> power plant emissions quantification using simulated satellite images**

**Joffrey Dumont Le Brazidec et al.**

*Correspondence to:* Joffrey Dumont Le Brazidec ([joffrey.dumont@enpc.fr](mailto:joffrey.dumont@enpc.fr))

The copyright of individual parts of the supplement might differ from the article licence.

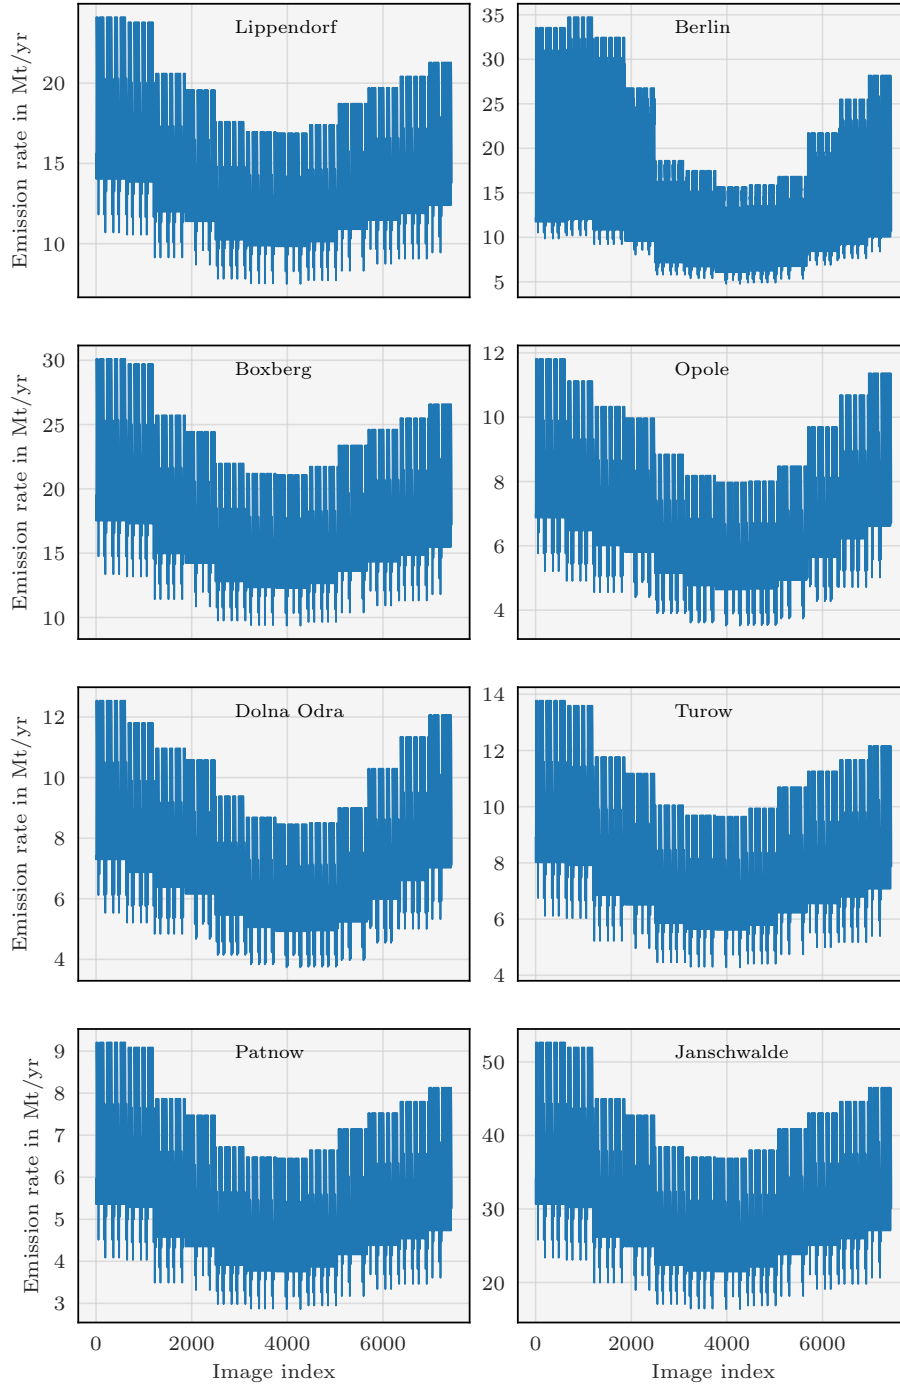

**Figure S1.** Emission rates corresponding to power plants and Berlin images in the train/validation dataset ( $\text{Mt}\cdot\text{yr}^{-1}$ )
